# Supplementary material
Source: Springer Nature journal article supplement (https://www.springermedizin.de/resource/supplementary/12990_2007_99_MOESM1_ESM.pdf/9612564)

# Normal

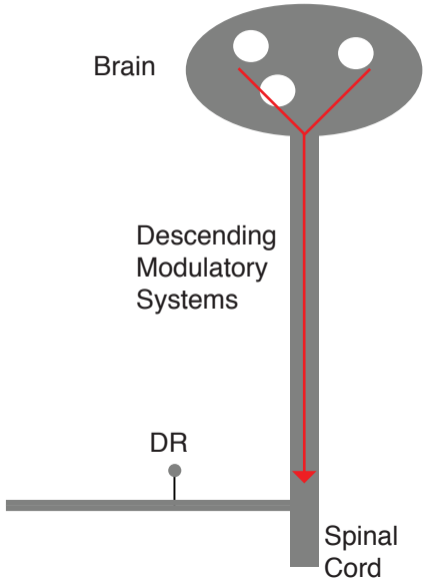

# Chronic Pain

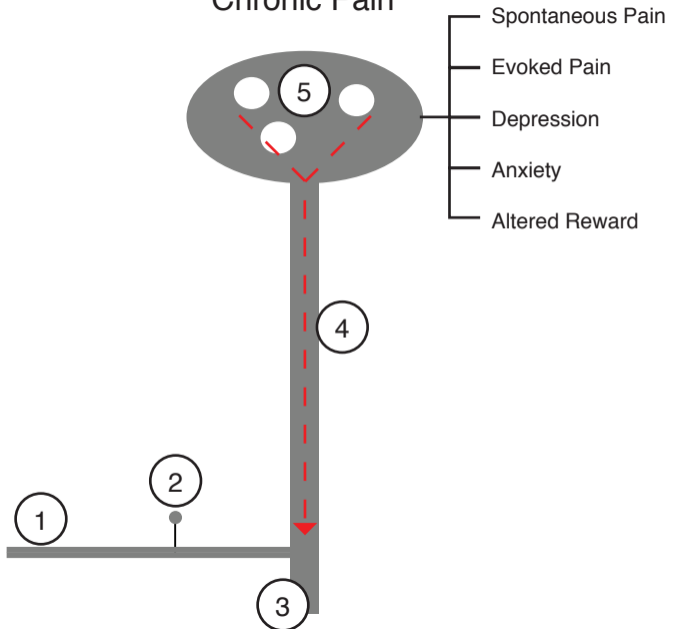

Supplement: MOESM1 [file 9612564]
